# Supplementary material for: Initiation of mtDNA transcription is followed by pausing, and diverges across human cell types and during evolution
Source: HighWire-hosted journal article supplement (doi:10.1101/gr.209924.116), 2017-01-03
Supplement: Supplemental_Fig_S1.docx [file Supplemental_Fig_S1.docx]

BLASTN 2.3.1+

Reference: Zheng Zhang, Scott Schwartz, Lukas Wagner, and

Webb Miller (2000), "A greedy algorithm for aligning DNA

sequences", J Comput Biol 2000; 7(1-2):203-14.

RID: JPJT0RVR01R

Database: Homo sapiens RefSeq RNA

151,521 sequences; 457,635,634 total letters

Query= gi|251831106|ref|NC_012920.1| Homo sapiens mitochondrion, complete

genome

Length=16569

Score E

Sequences producing significant alignments: (Bits) Value

ref|NM_001190702.1| Homo sapiens MT-RNR2-like 8 (MTRNR2L8), mRNA 1890 0.0

ref|NM_001190452.1| Homo sapiens MT-RNR2-like 1 (MTRNR2L1), mRNA 1890 0.0

ref|NM_001190470.1| Homo sapiens MT-RNR2-like 2 (MTRNR2L2), mRNA 1568 0.0

ref|NM_001190487.2| Homo sapiens MT-RNR2-like 6 (MTRNR2L6), mRNA 1428 0.0

ref|XR_243720.3| PREDICTED: Homo sapiens uncharacterized LOC1... 1086 0.0

ref|XR_253695.2| PREDICTED: Homo sapiens uncharacterized LOC1... 1075 0.0

ref|NM_001190489.1| Homo sapiens MT-RNR2-like 7 (MTRNR2L7), mRNA 1075 0.0

ref|NM_001190472.1| Homo sapiens MT-RNR2-like 3 (MTRNR2L3), mRNA 1038 0.0

ref|NM_001190708.1| Homo sapiens MT-RNR2-like 10 (MTRNR2L10),... 950 0.0

ref|NM_001190706.1| Homo sapiens MT-RNR2-like 9 (MTRNR2L9), mRNA 708 0.0

ref|NM_001190478.1| Homo sapiens MT-RNR2-like 5 (MTRNR2L5), mRNA 697 0.0

ref|NM_001190476.1| Homo sapiens MT-RNR2-like 4 (MTRNR2L4), mRNA 422 6e-115

ref|NR_106781.1| Homo sapiens microRNA 6723 (MIR6723), microRNA 159 5e-36

ref|NR_132964.1| Homo sapiens small nucleolar RNA, H/ACA box ... 143 5e-31

ref|NR_039666.1| Homo sapiens microRNA 4461 (MIR4461), microRNA 117 3e-23

ref|XR_247059.2| PREDICTED: Homo sapiens uncharacterized LOC1... 99.0 1e-17

ref|XR_937793.1| PREDICTED: Homo sapiens uncharacterized LOC1... 91.6 2e-15

ref|XR_920587.1| PREDICTED: Homo sapiens uncharacterized LOC1... 91.6 2e-15

ref|XR_429865.1| PREDICTED: Homo sapiens uncharacterized LOC1... 82.4 1e-12

ref|XR_428342.1| PREDICTED: Homo sapiens uncharacterized LOC1... 67.6 3e-08

**Supplemental Fig S1. NUMTs from *Homo sapiens* RefSeq RNA database.**
