# Supplementary material for: Initiation of mtDNA transcription is followed by pausing, and diverges across human cell types and during evolution
Source: HighWire-hosted journal article supplement (doi:10.1101/gr.209924.116), 2017-01-03
Supplement: Supplemental_Fig_S3.docx [file Supplemental_Fig_S3.docx]

*D. melanogaster*

*C. elegans*


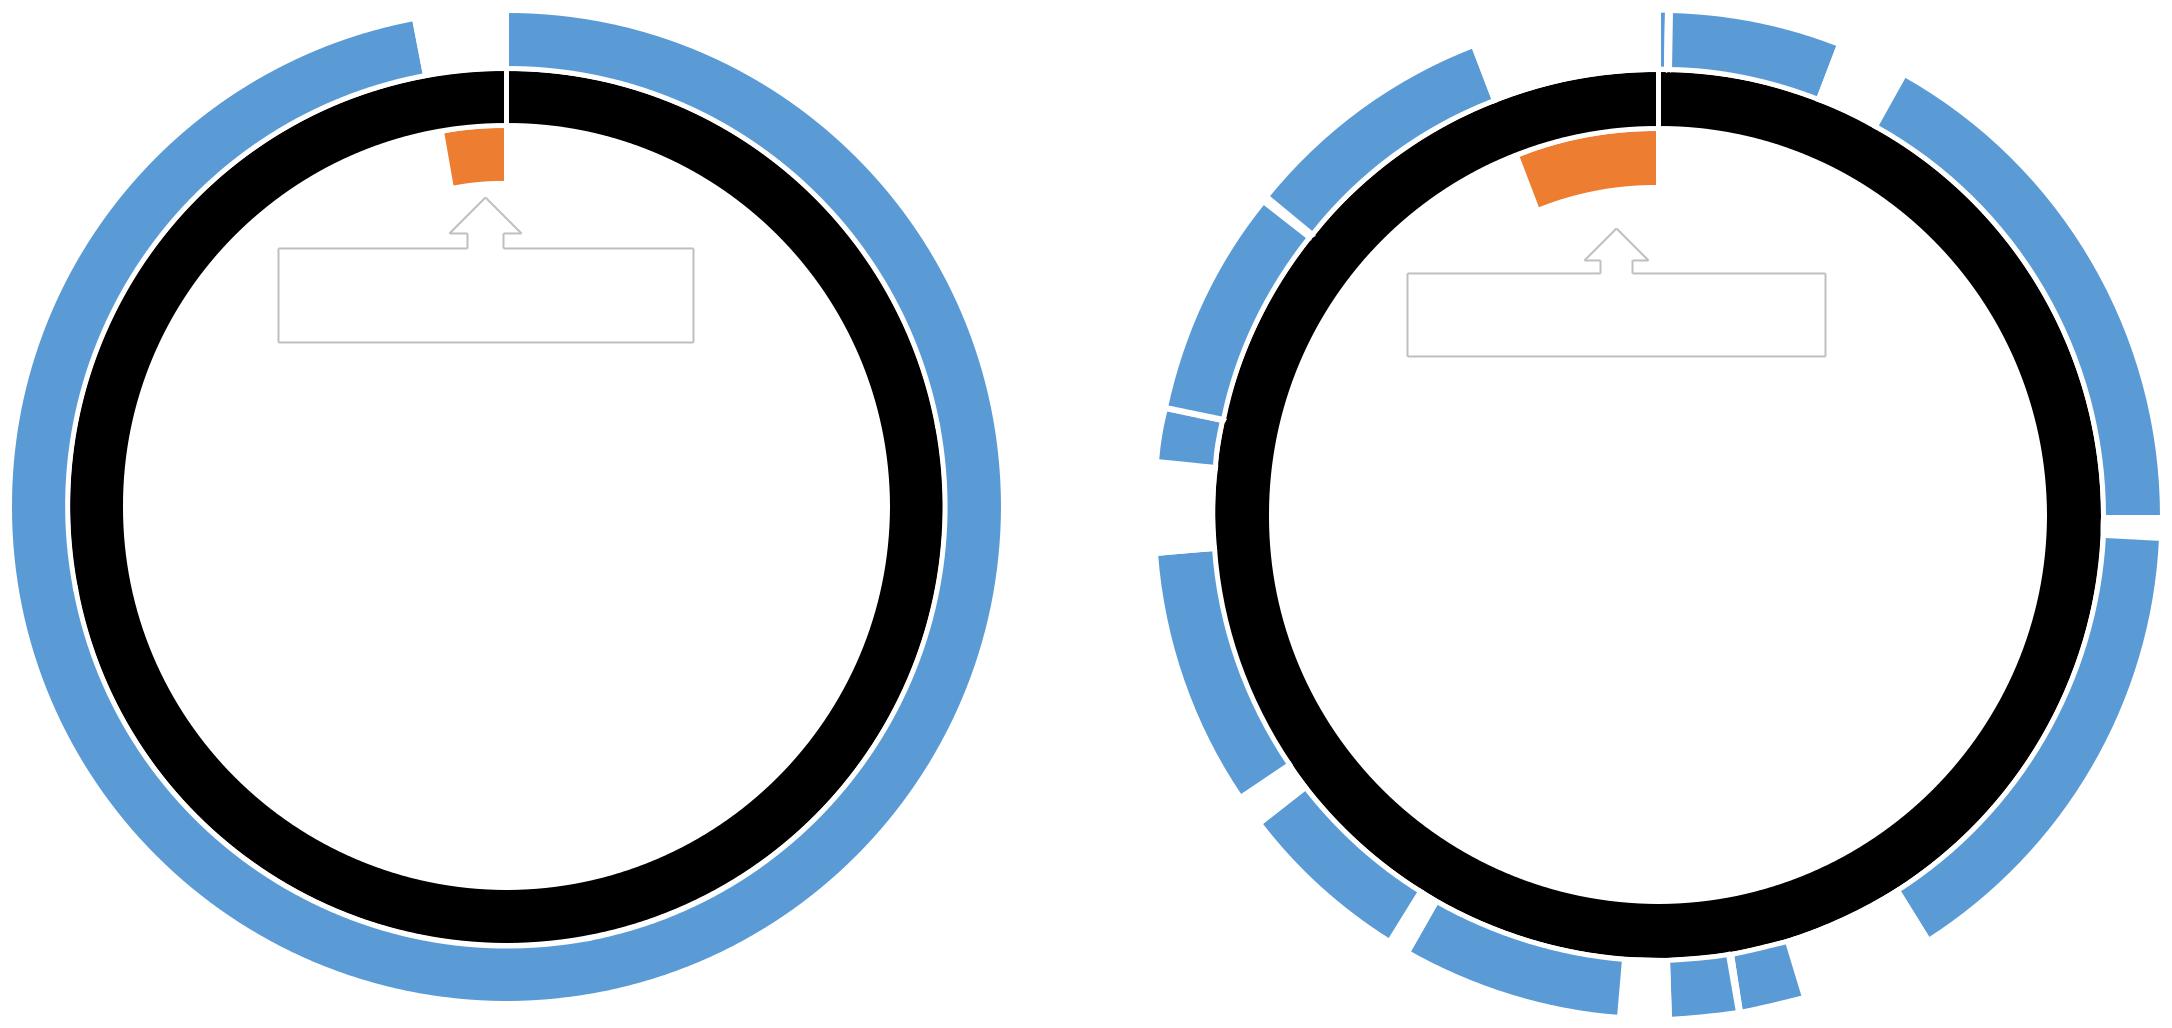


| control region | control region |  |
| --- | --- | --- |
|  |  |

**Supplemental Fig S3. De-novo assembly of medina in invertebrates.** PRO-seq and GRO-seq data enabled de-novo assembly of the entire invertebrate mtDNA sequence without a reference sequence. Left panel – *C. elegans*. Right panel – *Drosophila*. Scaffold used for de novo assembly: for *Drosophila* – *Bactrocera arecae* mtDNA and for worm - mtDNA from *Litoditis aff. Marina Pml*. Blue cycle – mapped de-novo assembly contigs. Black cycle – the scaffold mtDNA sequence used to map the de novo assembly contigs. For worm, the mtDNA reads covered 97% of the scaffold genome, and for *Drosophila* they covered 80% of the scaffold genome. Notably, the gaps mostly correspond to the non-coding control region.
