# Supplementary material for: Initiation of mtDNA transcription is followed by pausing, and diverges across human cell types and during evolution
Source: HighWire-hosted journal article supplement (doi:10.1101/gr.209924.116), 2017-01-03
Supplement: Supplemental_Figure_and_Table_Legends.docx [file Supplemental_Figure_and_Table_Legends.docx]

#### **Supplemental figures:**

**Supplemental Fig S1. NUMTs from *Homo sapiens* RefSeq RNA database.**

**Supplemental Fig S2. Density of reads encompassin the mtDNA light strand pausing site.** A. Sequencing reads coverage generated by GRO-seq/PRO seq experiments in the region surrounding the mtDNA light strand pausing sites in all tested cell lines. Each panel corresponds to read density in the indicated tested cell line. Y-axis: sequencing read coverage. X-axis: mtDNA position. B. Coverage of the 3’ end of reads generated by GRO-seq /PRO seq experiments in the region surrounding the mtDNA light strand pausing site, in all of tested cell lines. Y-axis: number of reads whose 3’ ends in the pausing site. X-axis: mtDNA positions.

**Supplemental Fig S3. De-novo assembly of mtDNA in invertebrates.** PRO-seq and GRO-seq data enabled de-novo assembly of the entire invertebrate mtDNA sequence without a reference sequence. Left panel – *C. elegans*. Right panel – *Drosophila*. Scaffold used for de novo assembly: for *Drosophila* – *Bactrocera arecae* mtDNA and for worm - mtDNA from *Litoditis aff. Marina Pml*. Blue cycle – mapped de-novo assembly contigs. Black cycle – the scaffold mtDNA sequence used to map the de novo assembly contigs. For worm, the mtDNA reads covered 97% of the scaffold genome, and for *Drosophila* they covered 80% of the scaffold genome. Notably, the gaps mostly correspond to the non-coding control region.

**Supplemental Table S1.** SRA accession numbers of samples used in this study.

**Supplemental Table S2.** Nucleotide positions with mutations that correspond to NUMTs.

**Supplemental Table S3.** Summary statistics of the sequence mapping process.

**Supplemental Table S4.** Calculated values of Human mtDNA pausing site density and related DGF sites.

**Supplemental Table S5.** RNA-DNA Difference (RDD) in mtDNA position 2617.

**Supplemental Table S6.** Ratio of light strand coverage versus heavy strand coverage across mammals.

**Supplemental Table S7.** List of mitochondrial reference genomes used in this study.

**Supplemental Table S8.** mtDNA haplogroups assigned to each of the analyzed samples.
