# Supplementary material for: Initiation of mtDNA transcription is followed by pausing, and diverges across human cell types and during evolution
Source: HighWire-hosted journal article supplement (doi:10.1101/gr.209924.116), 2017-01-03
Supplement: Supplemental_Table_S1.docx [file Supplemental_Table_S1.docx]

|  | **Cell line** | **Cell type** | **Cell origin** | **Organism** | **Experiment type** | **Experiment protocol** | **GEO accession** |
| --- | --- | --- | --- | --- | --- | --- | --- |
| **1** | CD4+ | Lymphocyte | Primary cells transformed by SV40 | *Homo sapiens* | PRO-seq | nuclei isolation | GSM1613181 |
| **2** | AC16 | Fibroblasts (ventricular cardiomyocytes) | Primary cell | *Homo sapiens* | GRO-seq | nuclei isolation | GSM1240746 |
| GSM1240747 |
| **3** | GM12004 | B-lymphocyte | Primary cells transformed by Epstein Bar Virus | *Homo sapiens* | PRO-seq | nuclei isolation | GSM980646 |
| GRO-seq | nuclei isolation | GSM980644 |
| **4** | GM12750 | B-lymphocyte | Primary cells transformed by Epstein Bar Virus | *Homo sapiens* | GRO-seq | nuclei isolation | GSM980645 |
| **5** | GM12878 | B-lymphocyte | Primary cells transformed by Epstein Bar Virus | GRO-seq | nuclei isolation | GSM1480326 |
| **6** | Hela | Epithelial (cervix) | Cancer | *Homo sapiens* | GRO-seq | nuclei isolation | GSM1518913 |
| GSM1518914 |
| **7** | IMR90 | Fibroblasts (fetal lung) | Primary cells | *Homo sapiens* | GRO-seq | nuclei isolation | GSM340901 |
| **8** | Jurkat | T-lymphocyte | Cancer | PRO-seq | nuclei isolation | GSM1613182 |
| **9** | K562 | Lymphoblast | Cancer | *Homo sapiens* | PRO-seq | permeabilized cells | GSM1480327 |
| GRO-seq | nuclei isolation | GSM1480325 |
| **10** | MCF7 | Epithelial (breast) | Cancer | *Homo sapiens* | GRO-seq | nuclei isolation | GSM678535 |
| GSM678536 |
| **11** | U20S | Epithelial (bone) | Cancer | *Homo sapiens* | GRO-seq | nuclei isolation | GSM1634453 |
| GSM1634455 |
|  |  |  |  |  |  |  |  |
| **** | CD4+ | Lymphocyte |  | *Pan troglodytes* | PRO-seq |  | GSM2265106; GSM2265107 |
| **** | CD4+ | Lymphocyte |  | *Macaca mulatta* | PRO-seq |  | GSM2265112 |
| **** | CD4+ | Lymphocyte |  | *Rattus norvegicus* | PRO-seq |  | GSM2265114 |
| **** | CD4+ | Lymphocyte |  | *Mus musculus* | PRO-seq |  | GSM2265113 |
| **** | S2 |  |  | *Drosophila melanogaster* | PRO-seq |  | GSM1032757; GSM1032758 |
|  |
| **** | L3 |  |  | *Caenorhabditis elegans* | GRO-seq |  | GSE43084 |

**Supplemental Table S1.** SRA accession numbers of samples used in this study.
