# Supplementary material for: Initiation of mtDNA transcription is followed by pausing, and diverges across human cell types and during evolution
Source: HighWire-hosted journal article supplement (doi:10.1101/gr.209924.116), 2017-01-03
Supplement: Supplemental_Table_S3.docx [file Supplemental_Table_S3.docx]

| **Cell type** | **Experiment** | **Heavy stand** | | | **Light stand** | | |
| --- | --- | --- | --- | --- | --- | --- | --- |
| **Total coverage** | **SD** | **Number of nucleotide positions with >1% of coverage** | **Total coverage** | **SD** | **Number of nucleotide positions with >1% of coverage** |
| AC16 | GRO | 15.35 | 29.65 | 15102 | 28.80594311 | 31.882526 | 14543.00 |
| AC16 | GRO | 5.14 | 8.26 | 12605 | 25.38805339 | 32.268298 | 14255.00 |
| CD4+ | PRO | 52.18 | 74.31 | 15940 | 113.1045479 | 165.97776 | 15002.00 |
| GM12004 | GRO | 635.27 | 890.81 | 16206 | 3164.479253 | 3834.9581 | 13922.00 |
| GM12004 | PRO | 100.67 | 267.52 | 12554 | 766.9127257 | 1272.4298 | 14007.00 |
| GM12750 | GRO | 812.17 | 1273.71 | 15913 | 1957.138068 | 2723.5597 | 13877.00 |
| GM12878 | GRO | 1087.86 | 1564.18 | 16402 | 3411.857643 | 4667.5559 | 14140.00 |
| Hela | GRO | 90.30 | 356.25 | 14495 | 149.2749894 | 254.83114 | 14022.00 |
| Hela | GRO | 1538.50 | 2386.21 | 16008 | 1341.11101 | 1984.9528 | 14642.00 |
| IMR90 | GRO | 38.69 | 64.57 | 15807 | 24.21380685 | 49.620576 | 14256.00 |
| Jurkat | PRO | 194.11 | 357.01 | 16167 | 456.2885788 | 749.61336 | 15191.00 |
| K562 | GRO | 824.89 | 1321.58 | 15873 | 1075.695355 | 1413.8413 | 14690.00 |
| K562 | PRO | 14900.09 | 22229.30 | 15971 | 24317.09519 | 23401.91 | 15141.00 |
| MCF7 | GRO | 2.71 | 7.72 | 6822 | 43.50437881 | 110.10255 | 12623.00 |
| MCF7 | GRO | 13.66 | 34.14 | 12861 | 119.7327414 | 310.55942 | 13518.00 |
| U20S | GRO | 1871.55 | 2993.70 | 16201 | 2626.611343 | 3127.0646 | 13717.00 |
| U20S | GRO | 1543.60 | 2196.86 | 16298 | 2081.023797 | 2683.2974 | 13716.00 |

**Supplemental Table S3.** Summary statistics of the sequence mapping process.
