# Supplementary material for: Initiation of mtDNA transcription is followed by pausing, and diverges across human cell types and during evolution
Source: HighWire-hosted journal article supplement (doi:10.1101/gr.209924.116), 2017-01-03
Supplement: Supplemental_Table_S4.xlsx [file Supplemental_Table_S4.xlsx]

## Sheet: Pausing near the TIS 
Cell type	Heavy strand			Light strand
	Pausing position	Pausing index	p.value	Pausing position	Pausing index	p.value
AC16	685	0.08	0.981196	370	2.46346	<<0.00001
CD4	888	0.18	1	366	19.9725	<<0.00001
GM12004	625	0.5	1	356	2.54954	<<0.00001
GM12750	747	0.18	1	359	3.19795	<<0.00001
GM12878	748	0.24	1	378	2.54318	<<0.00001
Hela	606	0.43	1	380	19.5038	<<0.00001
IMR90	653	1.81	<<0.00001	380	43.6829	<<0.00001
Jurkat	717	0.2	1	367	26.9947	<<0.00001
K562 *	707	0.0636055	1	380	1.70407	<<0.00001
K562 **	857	0.06482	1	372	3.48149	<<0.00001
MCF7	597	0.95	<<0.00001	370	20.863	<<0.00001
U2OS rep1	693	0.136936	1	362	1.53152	<<0.00001
U2OS rep2	693	0.251321	1	362	1.8235	<<0.00001
*Nuclei isolation. ** Whole permeabilized cells.
Rep – biological replicated experiment
Supplemental Table S4. Calculated values of Human mtDNA pausing site density and related DGF sites.

## Sheet: DGF sites downstream to the TIS
DGF site downstream to the light strand pausing site
			mtDNA positions
	Cell line	source	Rep1	Rep2
1	CD4+	NA	xxx	xxx
2	AC16	NA	xxx	xxx
3	GM12004	NA	xxx	xxx
4	GM12750	NA	xxx	xxx
5	GM12878	ENCODE	297-326	269-323
6	Hela	ENCODE	269-319	271-322
7	IMR90	RoadMap	274-324	293-324
8	Jurkat	ENCODE	277-327	299-336
9	K562	ENCODE	277-330	276-330
10	MCF7	ENCODE	298-326	329
11	U20S	NA	xxx	xxx

## Sheet: Pausing of the Heavy strand
Cell type	Heavy strand
	Pausing position	Pausing index	p.value
AC16	5822	0.925704	0.101547
CD4	5861	3.12998	<<0.00001
GM12004	5823	2.09627	<<0.00001
GM12750	5823	2.46976	<<0.00001
GM12878	5823	1.67879	<<0.00001
Hela	5823	1.94133	<<0.00001
IMR90	5813	0.84926	0.0416159
Jurkat	5846	3.93567	<<0.00001
K562 *	5823	3.48402	<<0.00001
K562 **	5842	1.87313	<<0.00001
MCF7	5819	5.43449	<<0.00001
U2OS rep1	5829	1.08092	2.6017e-05
U2OS rep2	5830	1.59382	<<0.00001
*Nuclei isolation. ** Whole permeabilized cells.
Rep – biological replicated experiment
