# Supplementary material for: Initiation of mtDNA transcription is followed by pausing, and diverges across human cell types and during evolution
Source: HighWire-hosted journal article supplement (doi:10.1101/gr.209924.116), 2017-01-03
Supplement: Supplemental_Table_S5.docx [file Supplemental_Table_S5.docx]

| Cell type | Position | Ref | A | C | G | T |
| --- | --- | --- | --- | --- | --- | --- |
| AC16 | 2617 | A | 14 | 0 | 0 | 0 |
| AC16 | 2617 | A | 7 | 0 | 0 | 0 |
| CD4+ | 2617 | A | 158 | 0 | 0 | 0 |
| GM12004 | 2617 | A | 5895 | 1 | 2 | 0 |
| GM12004 | 2617 | A | 175 | 0 | 0 | 0 |
| GM12750 | 2617 | A | 6310 | 0 | 1 | 0 |
| GM12878 | 2617 | A | 6462 | 1 | 0 | 3 |
| Hela | 2617 | A | 1925 | 0 | 2 | 1 |
| Hela | 2617 | A | 2558 | 1 | 2 | 7 |
| IMR90 | 2617 | A | 61 | 0 | 1 | 7 |
| Jurkat | 2617 | A | 622 | 2 | 0 | 0 |
| K562 | 2617 | A | 2106 | 0 | 2 | 4 |
| K562 | 2617 | A | 73284 | 9 | 13 | 23 |
| MCF7 | 2617 | A | 9 | 1 | 0 | 0 |
| MCF7 | 2617 | A | 22 | 0 | 0 | 0 |
| U2OS | 2617 | A | 5426 | 0 | 22 | 70 |
| U2OS | 2617 | A | 4751 | 0 | 3 | 23 |

**Supplemental Table S5.** RNA-DNA Difference (RDD) in mtDNA position 2617.
