# Supplementary material for: Initiation of mtDNA transcription is followed by pausing, and diverges across human cell types and during evolution
Source: HighWire-hosted journal article supplement (doi:10.1101/gr.209924.116), 2017-01-03
Supplement: Supplemental_Table_S6.docx [file Supplemental_Table_S6.docx]

|  |  | **Human** | **Chimpanzee** | **Rhesus** | **Rat** | **Mouse** |
| --- | --- | --- | --- | --- | --- | --- |
| **Entire strands** | Average | 2.167445 | 2.02489459 | 1.512063 | 0.641256 | 0.993669 |
| SD | NA | 0.032120487 | 0.283752 | NA | NA |
| **Coding region** | Average | 1.888149 | 1.859614354 | 1.195634 | 0.53306 | 0.597653 |
| SD | NA | 0.102073342 | 0.225186 | NA | NA |

**Supplemental Table S6.** Ratio of light strand coverage versus heavy strand coverage across mammals.
