# Supplementary material for: Initiation of mtDNA transcription is followed by pausing, and diverges across human cell types and during evolution
Source: HighWire-hosted journal article supplement (doi:10.1101/gr.209924.116), 2017-01-03
Supplement: Supplemental_Table_S7.docx [file Supplemental_Table_S7.docx]

|  | |  |  |
| --- | --- | --- | --- |
| **Species** | | **NCBI Reference Sequence** |  |
| *Homo sapiens* | Human | NC_012920.1 | Revised Cambridge Reference Sequence ("rCRS") |
| *Pan troglodytes* | Chimpanzee | NC_001643.1 |  |
| *Macaca mulatta* | Rhesus | NC_005943.1 |  |
| *Rattus norvegicus* | Rat | NC_001665.2 |  |
| *Mus musculus* | Mice | NC_005089.1 |  |
| *Drosophila melanogaster* | Drosophila | NC_024511.2 |  |
| *Caenorhabditis elegans* | C. elegans | NC_001328.1 |  |
|  |  |  |  |
|  |  |  |  |
| **De-novo assembly** |  |  |  |
| **species** | | **NCBI Reference Sequence** |  |
| *Bactrocera arecae* | | NC_028327.1 | for drosophila de-novo assembly |
| *Litoditis aff. Marina Pml* | | NC_027694.1 | for C. elegans de-novo assembly |

**Supplemental Table S7.** List of mitochondrial reference genomes used in this study.
