# Supplementary material for: Initiation of mtDNA transcription is followed by pausing, and diverges across human cell types and during evolution
Source: HighWire-hosted journal article supplement (doi:10.1101/gr.209924.116), 2017-01-03
Supplement: Supplemental_Table_S8.docx [file Supplemental_Table_S8.docx]

| **Cell type** | **Haplogroup** |
| --- | --- |
|
| AC16 | J1c2e2 |
| CD4+ | H2a2 |
| GM12004 | H3 |
| GM12750 | T2f1a1 |
| GM12878 | H13a1a1a |
| Hela | L3b1a1a |
| IMR90 | W3a1 |
| Jurkat | K1a |
| K562 | T2a1b1a1a |
| MCF7 | H3u1 |
| U20S | J1c2c1 |

**Supplemental Table S8.** MtDNA haplogroups assigned to each of the analyzed samples.
